# Supplementary material for: Thin films of poly(vinylidene fluoride-co-hexafluoropropylene)-ionic liquid mixtures as amperometric gas sensing materials for oxygen and ammonia
Source: Royal Society of Chemistry journal article supplement (doi:10.1039/c9an02153a), 2020-01-01
Supplement: c9an02153a1.pdf [file c9an02153a1.pdf]

**Supporting Information for:**

**Thin films of poly(vinylidene fluoride-co-hexafluoropropylene)-ionic liquid mixtures as amperometric gas sensing materials for oxygen and ammonia**

Junqiao Lee, Ghulam Hussain, Nieves López-Salas, Douglas R. MacFarlane and Debbie S. Silvester

*The Analyst*

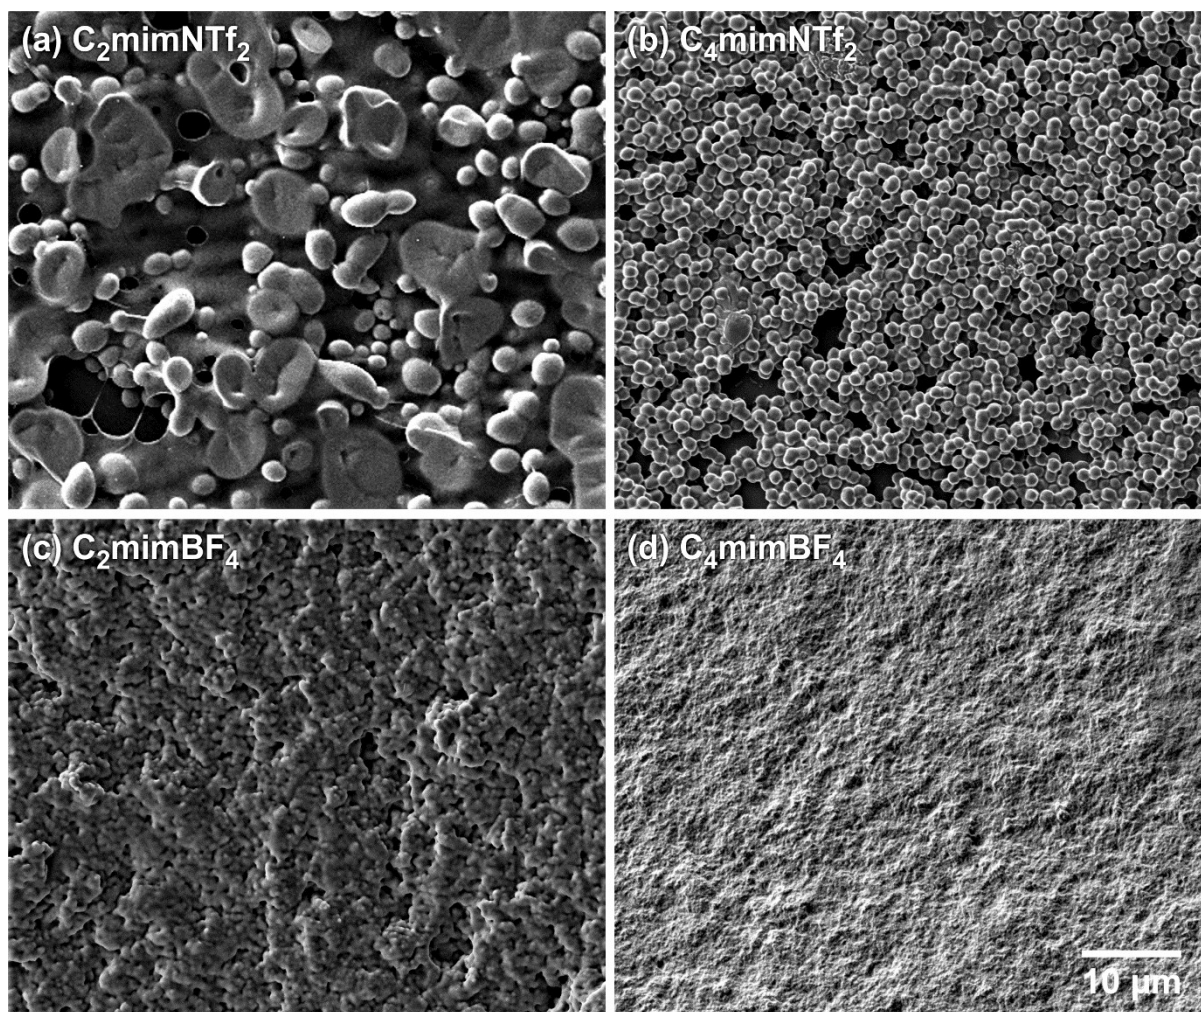

**Figure S1.** Scanning electron microscopy (SEM) images of: (a)  $[\text{C}_2\text{mim}][\text{NTf}_2]:\text{PVDF-HFP}$ , (b)  $[\text{C}_4\text{mim}][\text{NTf}_2]:\text{PVDF-HFP}$ , (c)  $[\text{C}_2\text{mim}][\text{BF}_4]:\text{PVDF-HFP}$ , and (d)  $[\text{C}_4\text{mim}][\text{BF}_4]:\text{PVDF-HFP}$  drop-casted films.

The images in Figure S1 show the very different structures formed by varying the RTIL cation and anion. There are significant differences simply by changing from the ethyl-substituted imidazolium cation ( $[\text{C}_2\text{mim}]^+$ ) to the butyl-substituted imidazolium cation ( $[\text{C}_4\text{mim}]^+$ ). Gradual deformation of the polymer “spheres” was observed during the SEM imaging as the result of exposure to the electron beam.

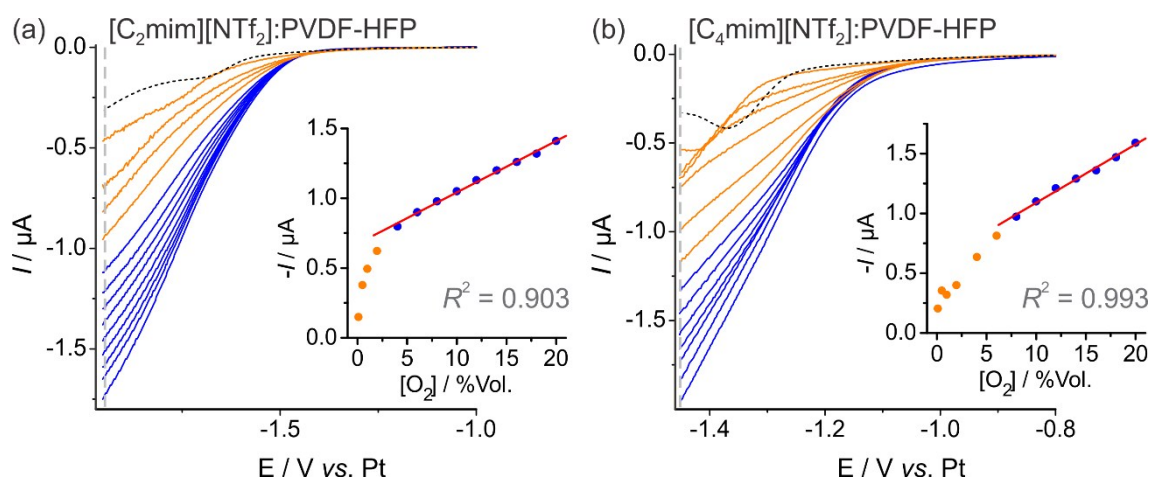

**Figure S2.** Linear sweep voltammetry (LSV) at a scan rate of  $10 \text{ mVs}^{-1}$  for O<sub>2</sub> reduction at 20, 18, 16, 14, 12, 10, 8, 6, 4, 2, 1, 0.5 and 0.1 % vol. O<sub>2</sub>, using a 2:1 mass-ratio RTIL:PVDF-HFP gel-polymer electrolyte on a Pt TFE, with (a) [C<sub>2</sub>mim][NTf<sub>2</sub>] and (b) [C<sub>4</sub>mim][NTf<sub>2</sub>] as the RTIL. The black dashed lines are the responses in the absence of O<sub>2</sub>. The insets show corresponding plots of background corrected currents (extracted at potentials indicated by the light grey vertical dashed lines) vs. % vol. [O<sub>2</sub>], as well as the line of best fit within the linear range of each plot. The data points deviating from linear behaviour (orange) were not fitted.

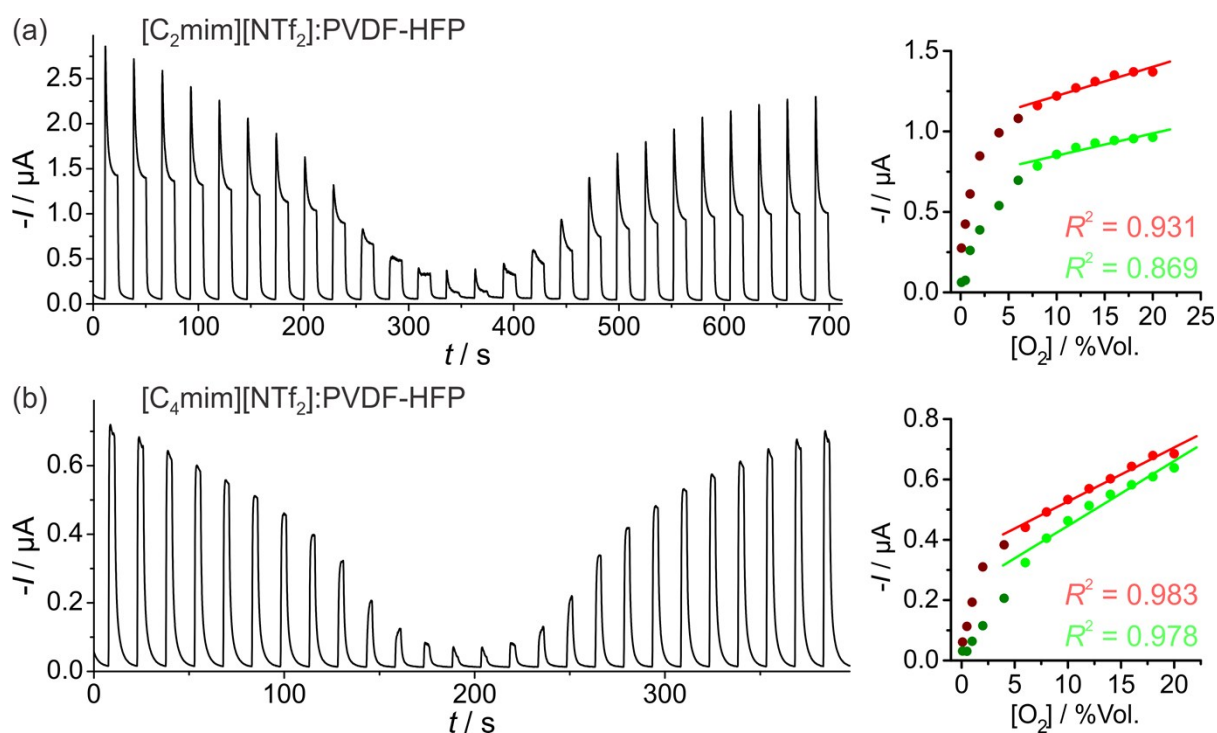

**Figure S3.** Long-term chronoamperometry (LTCA) for the reduction of 20, 18, 16, 14, 12, 10, 8, 6, 4, 2, 1, 0.5, 0.1 % vol.  $O_2$  in a 2:1 mass-ratio RTIL:PVDF-HFP gel-polymer electrolyte on a Pt TFE, with (a)  $[C_2mim][NTf_2]$ , and (b)  $[C_4mim][NTf_2]$  as the RTIL. A period of  $N_2$  flushing between each concentration change was carried out to monitor the return of current to the baseline. The figures on the right-hand-side are the corresponding plots of background-corrected current vs. % vol.  $[O_2]$ , as well as the line-of-best-fit, for the descending (red) and ascending (green) phases. The current at the end of the transient (not the spike) was measured.

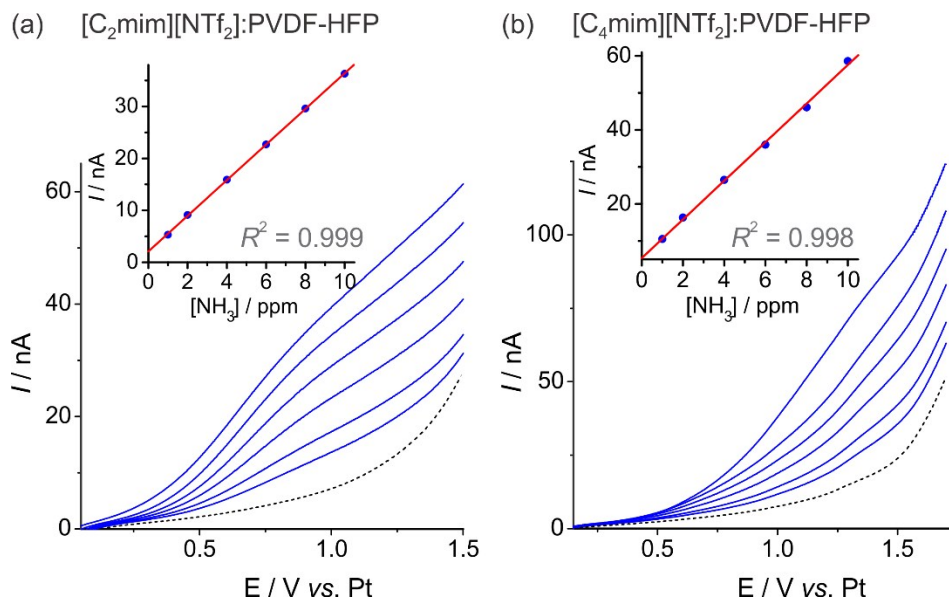

**Figure S4.** LSV for NH<sub>3</sub> oxidation at 10, 8, 6, 4, 2, 1 ppm of NH<sub>3</sub>, in a 2:1 mass-ratio RTIL:PVDF-HFP gel-polymer electrolyte on a Pt TFE, with (a) [C<sub>2</sub>mim][NTf<sub>2</sub>], and (b) [C<sub>4</sub>mim][NTf<sub>2</sub>] as the RTIL, at a scan rate of 10 mVs<sup>-1</sup>. The black dashed lines are the LSV responses in the absence of NH<sub>3</sub>. The insets are corresponding plots of background corrected currents (extracted at potentials indicated by the light-grey vertical dashed lines) vs. different ppm concentrations of [NH<sub>3</sub>], as well as the line of best fit.

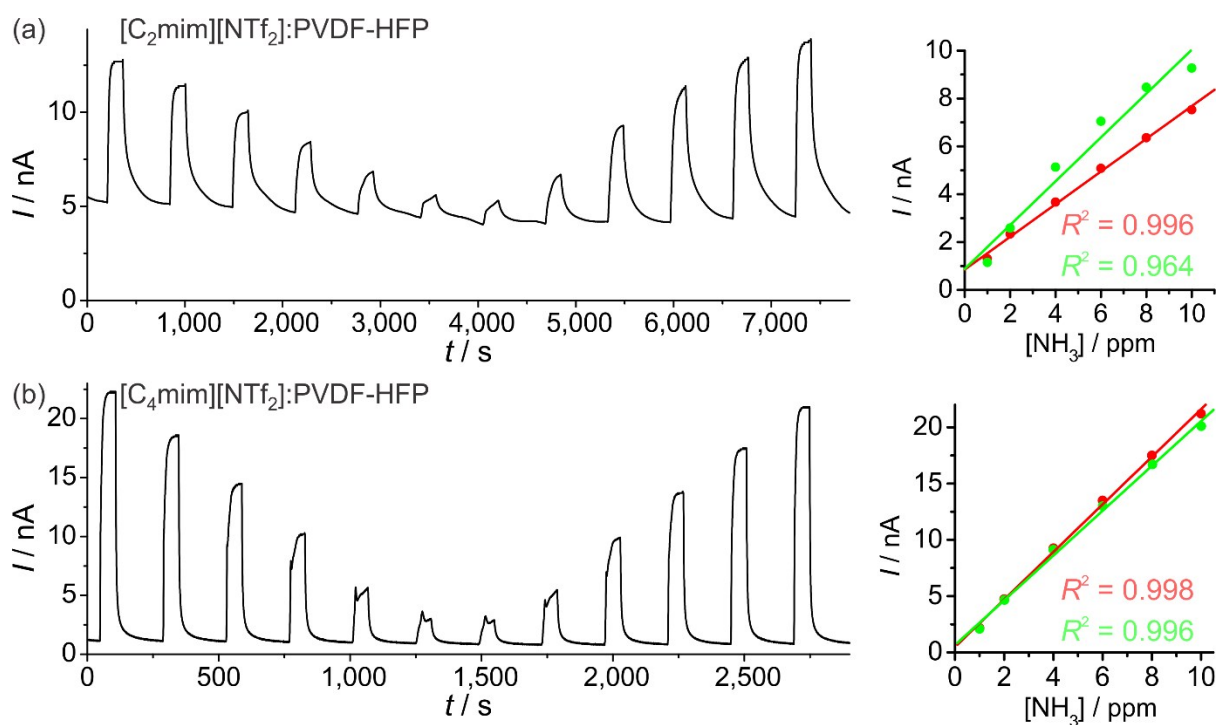

**Figure S5.** LTCA for the oxidation of NH<sub>3</sub> at (descending) 10, 8, 6, 4, 2, 1 ppm, and (ascending) 1, 2, 4, 6, 8, 10 ppm concentrations of NH<sub>3</sub>, alternating with N<sub>2</sub> purging between each concentration change, in a 2:1 mass-ratio RTIL:PVDF-HFP gel-polymer electrolyte on a Pt TFE, with (a) [C<sub>2</sub>mim][NTf<sub>2</sub>], and (b) [C<sub>4</sub>mim][NTf<sub>2</sub>] as the RTIL. The figures on the right-hand-side are the corresponding plots of background corrected current vs. different ppm concentrations of [NH<sub>3</sub>], as well as the lines of best fit for the descending (red) and ascending (green) [NH<sub>3</sub>] phases.

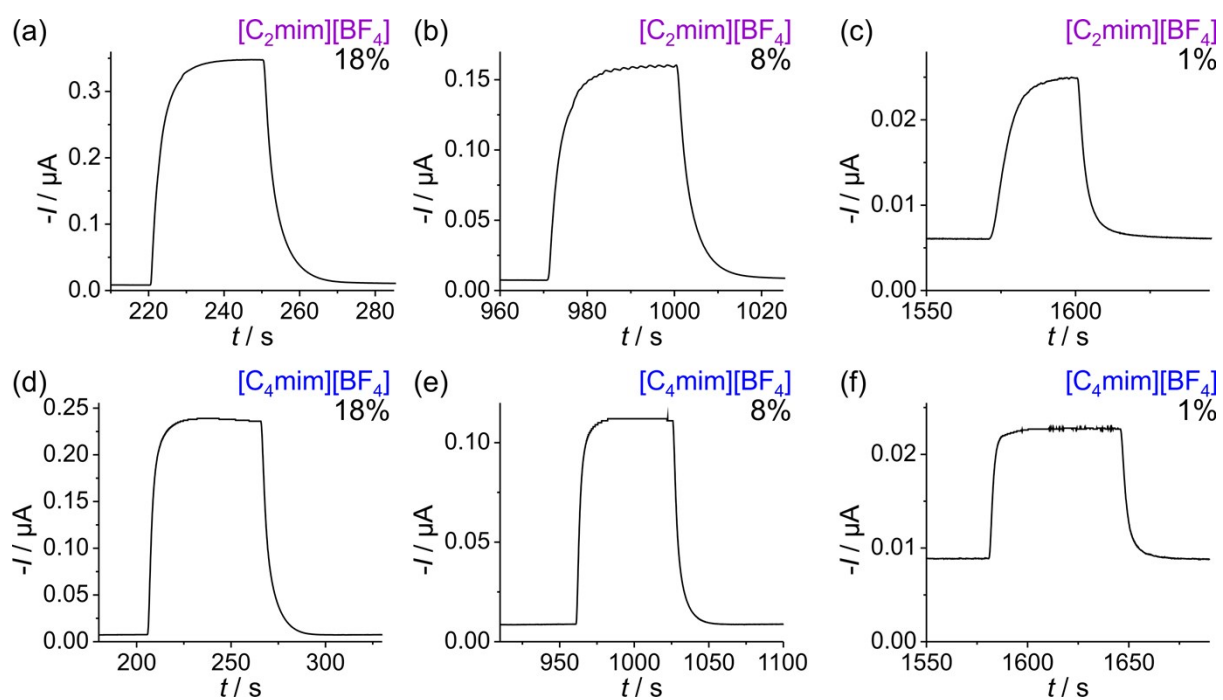

**Figure S6.** Close-up of selected current transients for oxygen sensing, taken from data in Figure 4 in the main text. The plots show the response and recovery cycles for 18 %, 8 % and 1 %  $O_2$  on the descending current run.

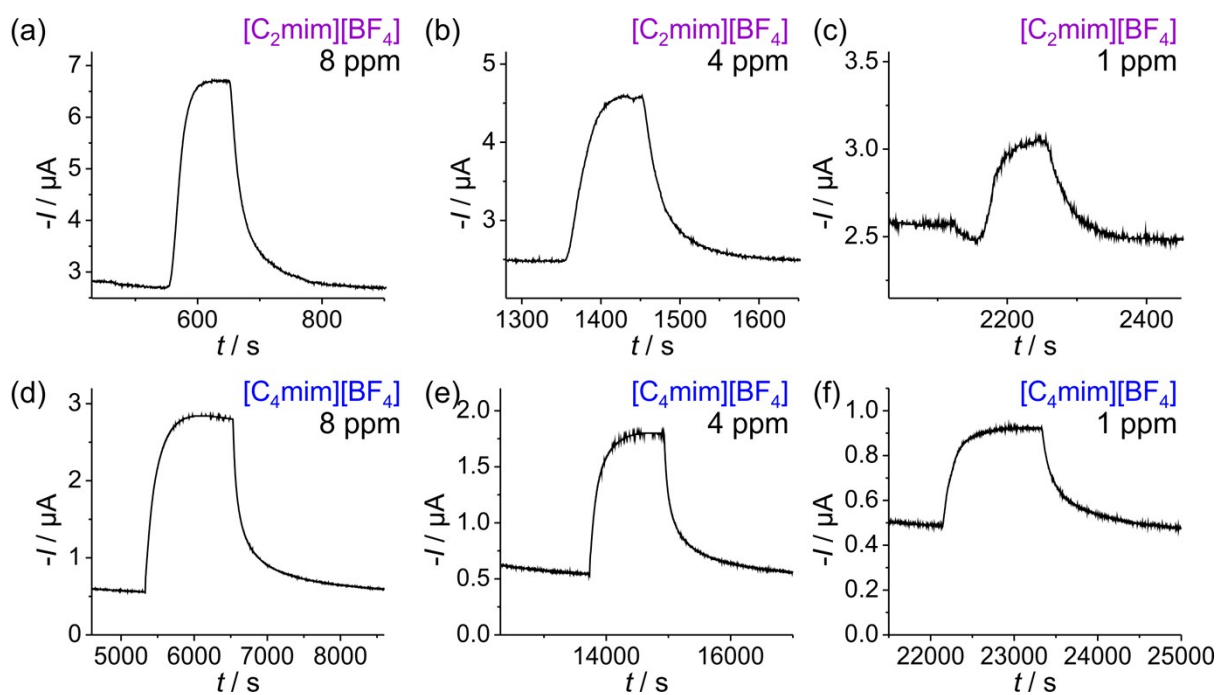

**Figure S7.** Close-up of selected current transients for ammonia sensing, taken from data in Figure 6 in the main text. The plots show the response and recovery cycles for 8, 4 and 1 ppm  $\text{NH}_3$  on the descending current run.
